# Supplementary material
Source: ML conference proceedings conference paper supplement (https://openaccess.thecvf.com/content/CVPR2023/html/Sun_Bi-Directional_Feature_Fusion_CVPR_2023_paper.html)
Supplement: Supplementary file 1 [file Sun_Bi-Directional_Feature_Fusion_CVPR_2023_supplemental.pdf]

## Supplementary Materials

Kexin Sun<sup>1</sup>, Zhineng Chen<sup>1,2</sup>, Gongwei Wang<sup>3</sup>, Jun Liu<sup>3</sup>, Xiongjun Ye<sup>4</sup>, Yu-Gang Jiang<sup>1</sup>

<sup>1</sup>School of Computer Science & Shanghai Collaborative Innovation Center of Intelligent Visual Computing,  
Fudan University

<sup>2</sup>Shanghai Qi Zhi Institute

<sup>3</sup>Peking University People's Hospital

<sup>4</sup>Department of Urology, National Cancer Center National Clinical Research Center for Cancer,  
Cancer Hospital, Chinese Academy of Medical Sciences and Peking Union Medical College

### 1. More Examples on ANHIR

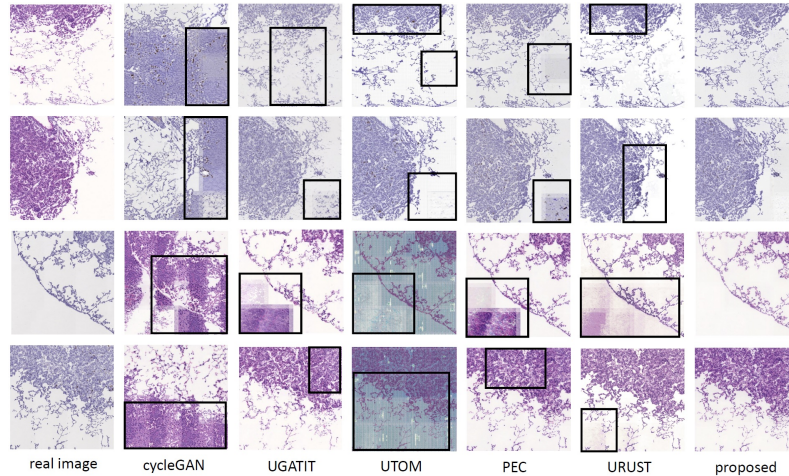

Figure 1. The virtual staining result on lung lesion dataset of ANHIR. The first column is real images in the dataset, followed by generated images of different models. The black boxes indicate the areas with square effect. The images with the best quality are generated by our model without any tuning, too.

Fig. 1 shows the results on lung lesion dataset of ANHIR, which are similar to the results on RCC and breast dataset. We can see some generated images of other models are still not realistic enough, with obvious square effect appears in them. Among these models, our proposed BFF-GAN achieves the best visual result without doubt.
